# Supplementary material for: Simple decision-tree tool to facilitate author identification of reporting guidelines during submission: a before–after study
Source: PubMed Central journal article supplement (PMC5803581; doi:10.1186/s41073-017-0044-9), 2017-12-18

# EQUATOR Reporting Guideline Decision Tree

## Which guidelines are relevant to my work?

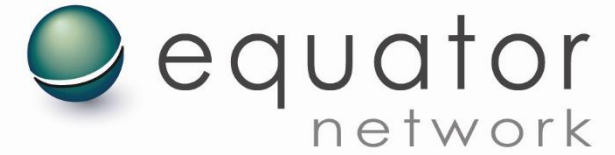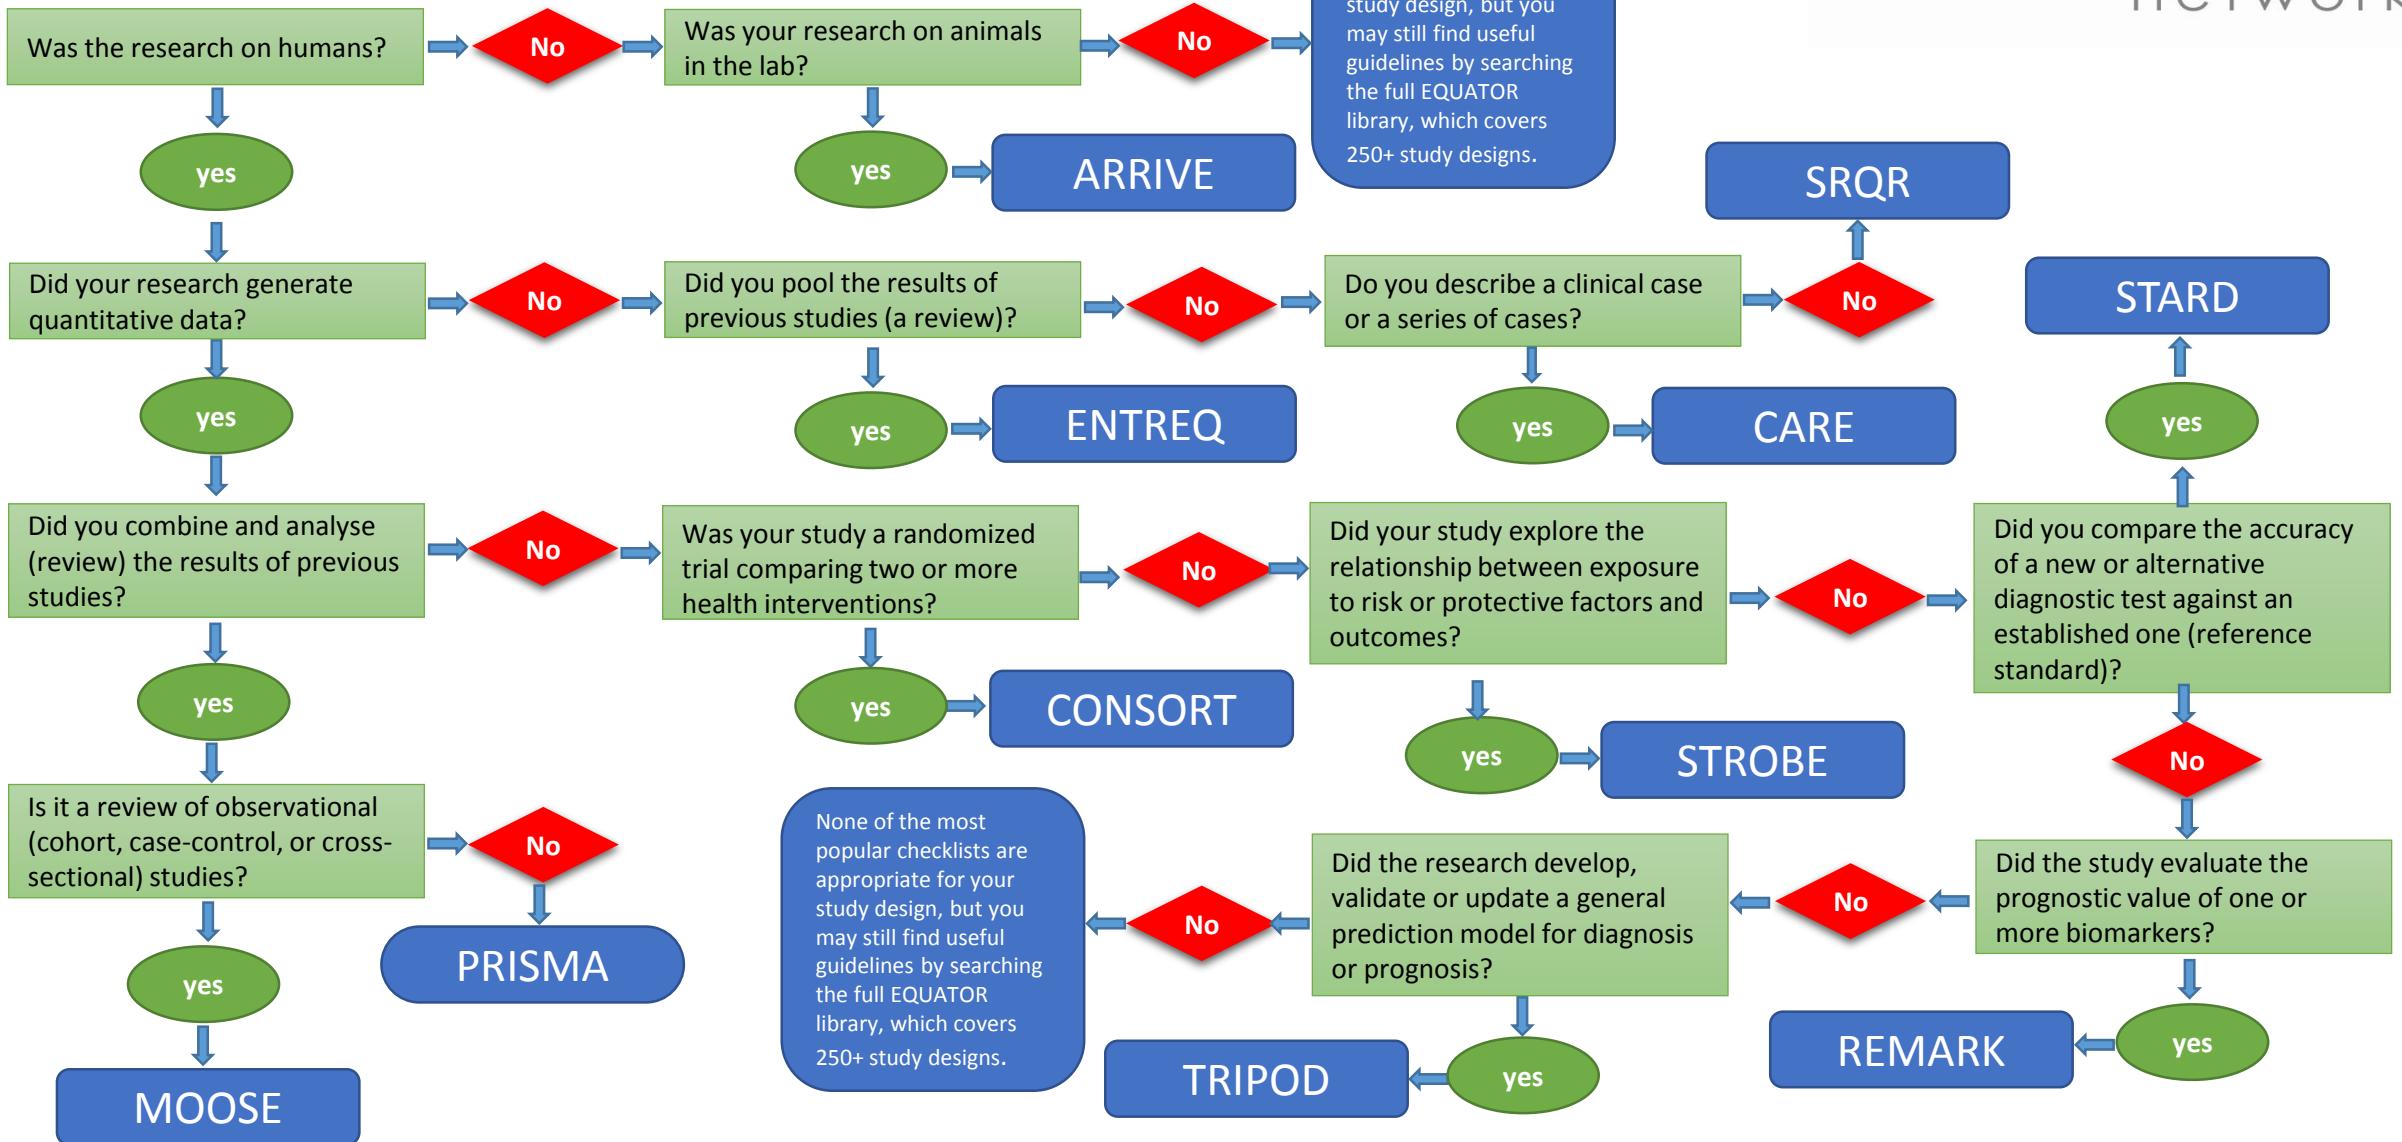

Supplement: 41073_2017_44_MOESM1_ESM.pdf [file 41073_2017_44_MOESM1_ESM.pdf]
